# Supplementary material
Source: MDPI journal article supplement (https://www.mdpi.com/2227-9717/9/1/149)
Supplement: s1 [file s1]

## Supplementary Materials

# Hydrothermal Functionalization of Oil Palm Empty Fruit Bunch Biochar for Wastewater Treatment Purposes

Izzudin Ibrahim <sup>1</sup>, Toshiki Tsubota <sup>2</sup>, Mohd Ali Hassan <sup>3</sup> and Yoshito Andou <sup>1,4,\*</sup>

<sup>1</sup> Department of Biological Functions Engineering, Graduate School of Life Science and Systems Engineering, Kyushu Institute of Technology, 2-4 Hibikino, Wakamatsu, Kitakyushu, Fukuoka 808-0196, Japan; ibrahim.izzudin516@mail.kyutech.jp

<sup>2</sup> Department of Applied Chemistry, Faculty of Engineering, Kyushu Institute of Technology, 1-1 Sensuicho, Tobata, Kitakyushu, Fukuoka 804-8550, Japan; tsubota@che.kyutech.ac.jp

<sup>3</sup> Department of Bioprocess Technology, Faculty of Biotechnology and Biomolecular Sciences, Universiti Putra Malaysia, 43400 UPM Serdang, Selangor, Malaysia; alihass@upm.edu.my

<sup>4</sup> Collaborative Research Centre for Green Materials on Environmental Technology, Kyushu Institute of Technology, 2-4 Hibikino, Wakamatsu, Kitakyushu, Fukuoka 808-0196, Japan

\* Correspondence: yando@life.kyutech.ac.jp

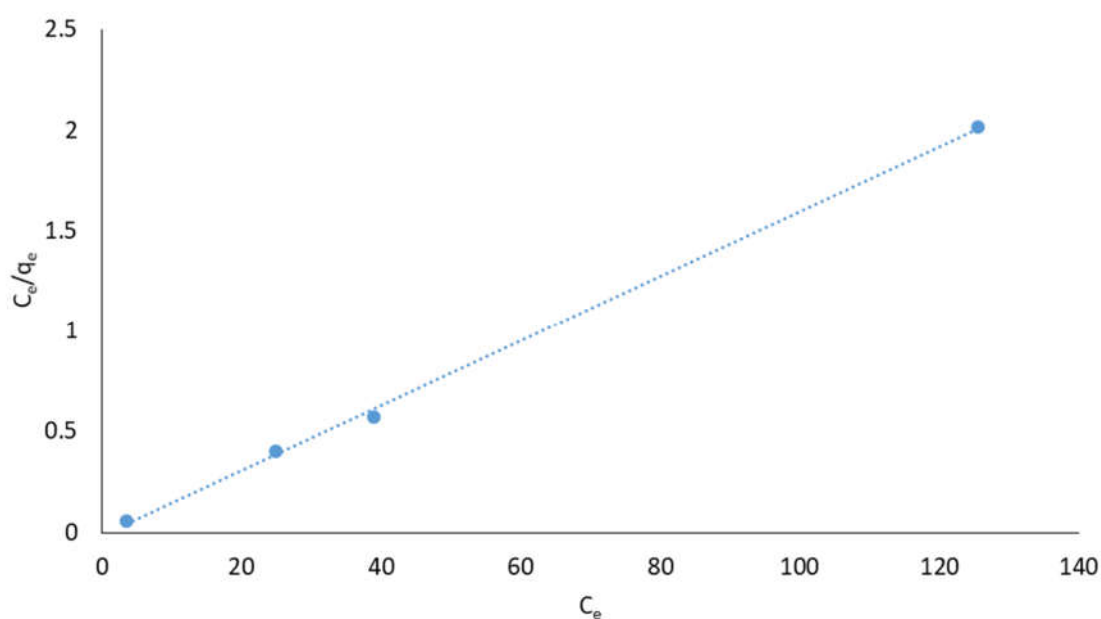

**Figure S1.** Langmuir isotherm model linear fitting curve for MB adsorption on EFB-FBC ( $C = 125, 150, 175$  and  $250$  mg/L, contact time =  $24$  h, temperature =  $30$  °C, dosage =  $2$  g/L)

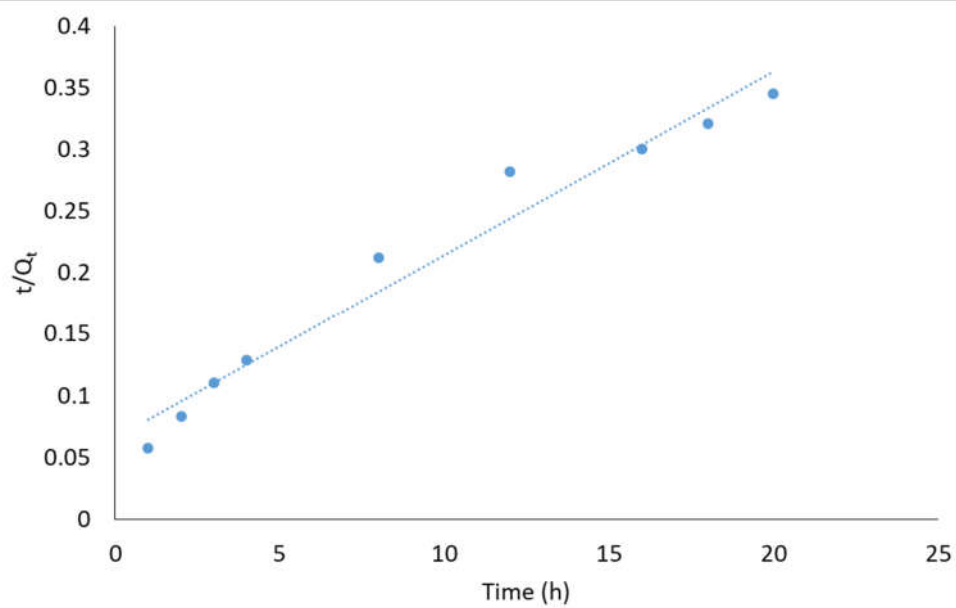

(a)

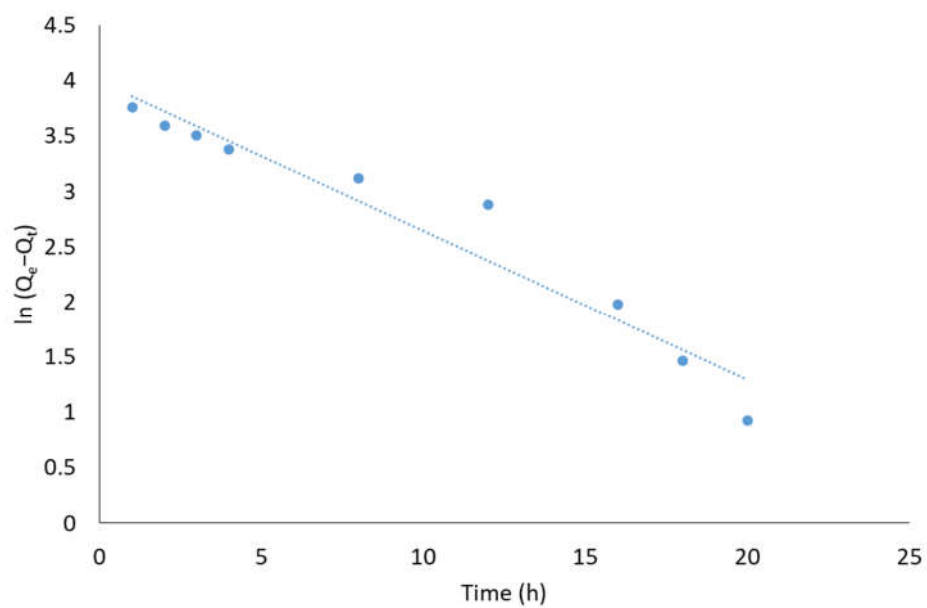

(b)

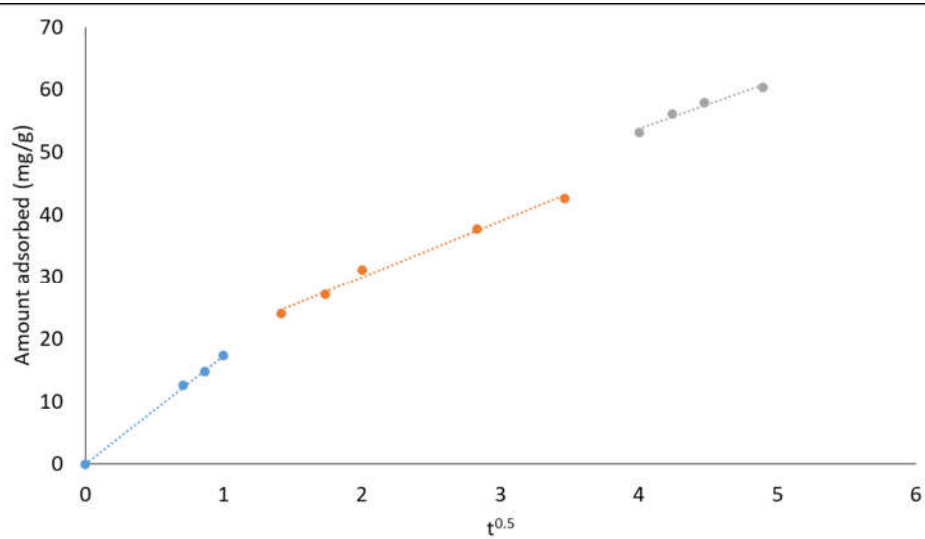

(c)

**Figure S2.** Methylene blue kinetic adsorption data for EFB-FBC fitted for (a) pseudo-first order (b) pseudo-second order and (c) intraparticle diffusion kinetic models.
